# Supplementary material for: Long-Term Performance of Monolithic Silica Aerogel with Different Hydrophobicities: Physical and Color Rendering Properties after an Accelerated Aging Process
Source: MDPI journal article supplement (doi:10.3390/gels9030210), 2023-03-10
Supplement: s1 [file s1]

Supplementary Materials

**Long-term performance of monolithic silica aerogel with different hydrophobicities: physical and color rendering properties after an accelerated aging process**

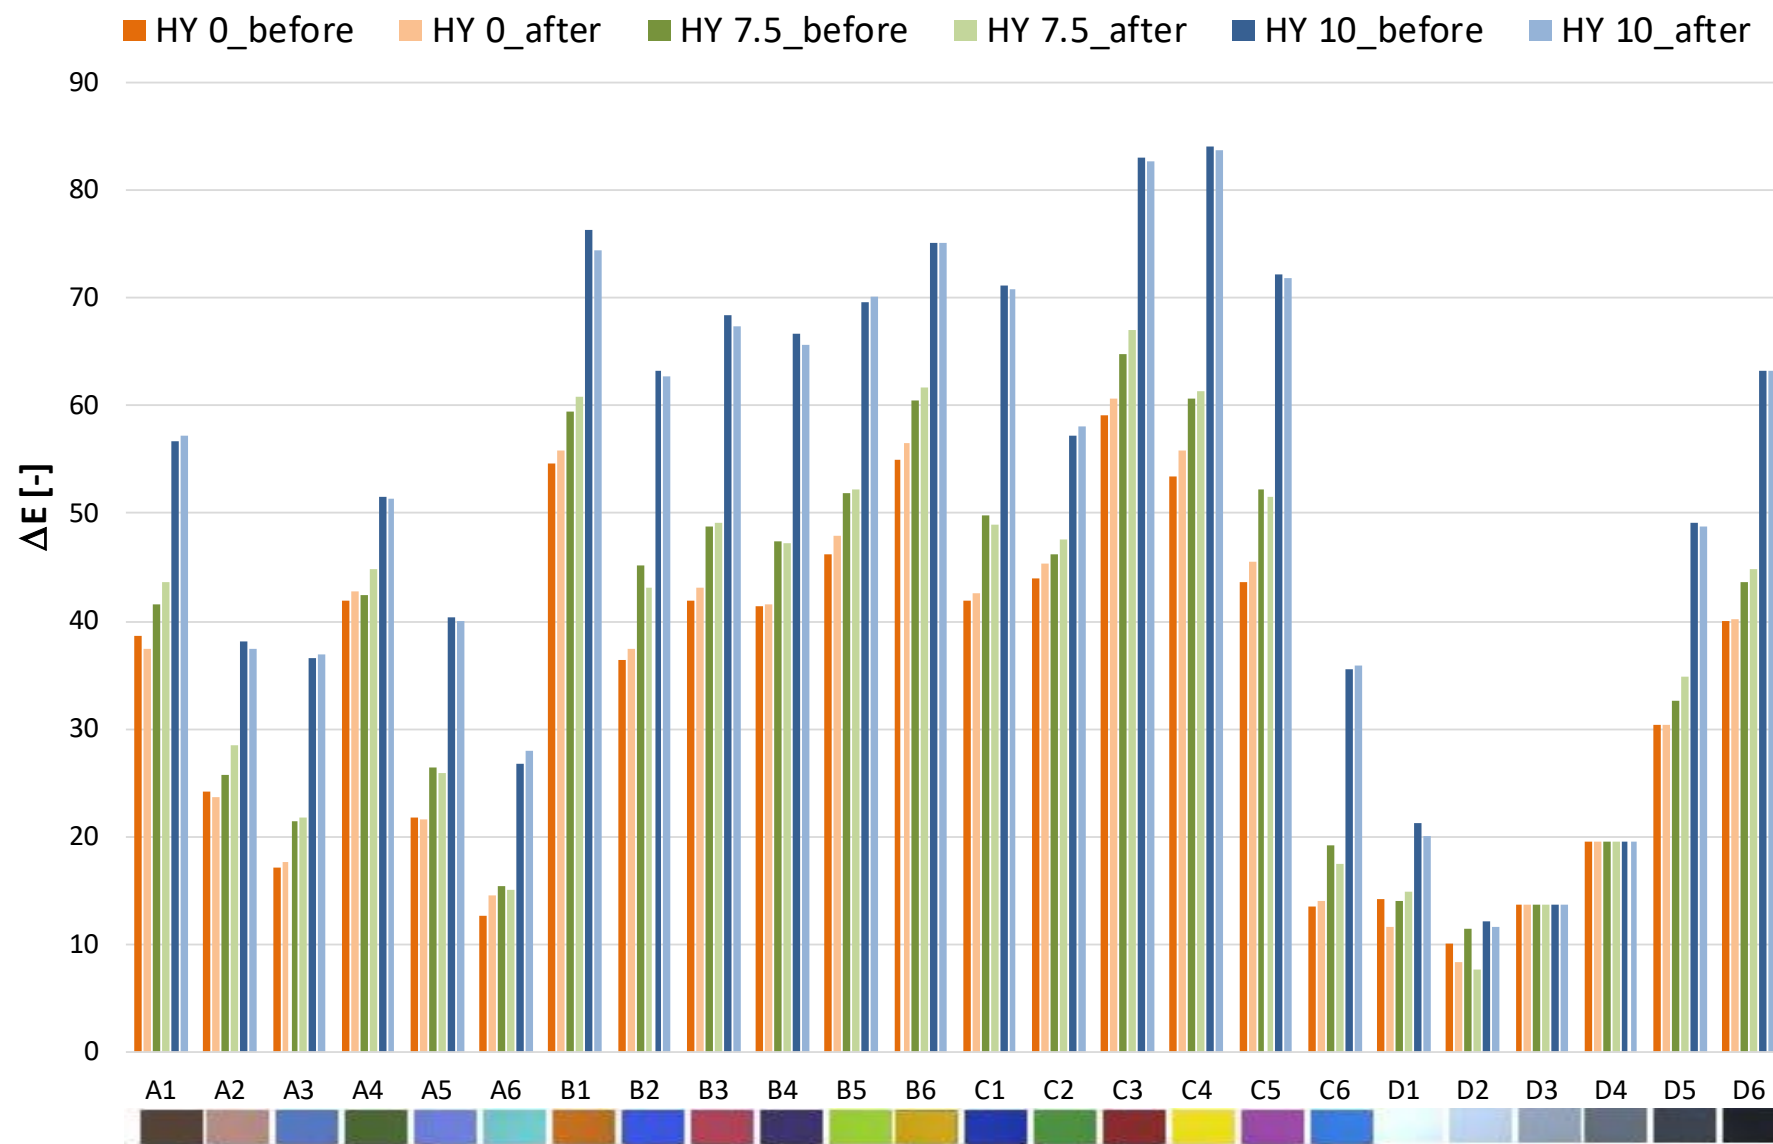

**Figure S1.** Comparison between color rendering variation of each aerogel specimen before and after aging.

**Table S1.** RGB coordinates for each color patch before and after the aging of the panes.

|                                                                                     |    | R    |     |        |     |       |     | G    |     |        |     |       |     | B    |     |        |     |       |     |
|-------------------------------------------------------------------------------------|----|------|-----|--------|-----|-------|-----|------|-----|--------|-----|-------|-----|------|-----|--------|-----|-------|-----|
|                                                                                     |    | HY 0 |     | HY 7.5 |     | HY 10 |     | HY 0 |     | HY 7.5 |     | HY 10 |     | HY 0 |     | HY 7.5 |     | HY 10 |     |
|                                                                                     |    | b*   | a*  | b*     | a*  | b*    | a*  | b*   | a*  | b*     | a*  | b*    | a*  | b*   | a*  | b*     | a*  | b*    | a*  |
|    | A1 | 114  | 115 | 127    | 126 | 172   | 169 | 169  | 167 | 189    | 190 | 255   | 255 | 196  | 194 | 208    | 216 | 255   | 255 |
|    | A2 | 171  | 167 | 171    | 175 | 199   | 202 | 202  | 196 | 208    | 214 | 255   | 255 | 204  | 200 | 206    | 219 | 254   | 255 |
|    | A3 | 118  | 122 | 132    | 131 | 176   | 180 | 194  | 196 | 206    | 210 | 255   | 255 | 228  | 230 | 222    | 238 | 255   | 254 |
|    | A4 | 113  | 116 | 126    | 126 | 173   | 178 | 186  | 189 | 199    | 202 | 255   | 255 | 200  | 204 | 208    | 217 | 255   | 254 |
|    | A5 | 131  | 133 | 139    | 141 | 182   | 186 | 195  | 197 | 204    | 210 | 255   | 255 | 232  | 234 | 220    | 240 | 254   | 254 |
|    | A6 | 132  | 133 | 140    | 141 | 178   | 181 | 234  | 232 | 228    | 237 | 255   | 255 | 221  | 222 | 211    | 227 | 254   | 254 |
|    | B1 | 178  | 179 | 176    | 181 | 196   | 202 | 187  | 190 | 199    | 203 | 255   | 255 | 176  | 181 | 190    | 199 | 255   | 255 |
|    | B2 | 107  | 111 | 122    | 122 | 171   | 173 | 180  | 184 | 196    | 200 | 255   | 255 | 235  | 237 | 223    | 242 | 255   | 255 |
|    | B3 | 169  | 170 | 169    | 174 | 199   | 203 | 174  | 177 | 191    | 193 | 255   | 255 | 200  | 204 | 205    | 217 | 255   | 255 |
|    | B4 | 110  | 113 | 123    | 123 | 172   | 179 | 171  | 173 | 190    | 191 | 255   | 255 | 211  | 212 | 213    | 224 | 255   | 254 |
|    | B5 | 158  | 158 | 161    | 163 | 197   | 201 | 242  | 239 | 239    | 245 | 255   | 255 | 182  | 184 | 195    | 201 | 255   | 255 |
|    | B6 | 192  | 192 | 190    | 193 | 213   | 216 | 219  | 217 | 222    | 226 | 255   | 255 | 173  | 175 | 189    | 194 | 255   | 255 |
|    | C1 | 96   | 99  | 111    | 111 | 165   | 165 | 169  | 171 | 185    | 190 | 255   | 255 | 219  | 218 | 212    | 228 | 255   | 255 |
|    | C2 | 115  | 118 | 126    | 129 | 171   | 176 | 210  | 211 | 215    | 224 | 255   | 255 | 194  | 198 | 202    | 214 | 255   | 255 |
|    | C3 | 148  | 151 | 153    | 158 | 190   | 193 | 167  | 173 | 187    | 192 | 255   | 255 | 197  | 201 | 205    | 218 | 255   | 255 |
|    | C4 | 218  | 217 | 210    | 216 | 237   | 237 | 253  | 250 | 250    | 255 | 255   | 255 | 165  | 169 | 181    | 188 | 255   | 254 |
|    | C5 | 162  | 162 | 164    | 167 | 197   | 199 | 175  | 178 | 192    | 194 | 255   | 255 | 217  | 219 | 214    | 227 | 255   | 255 |
|  | C6 | 105  | 107 | 119    | 119 | 168   | 169 | 195  | 195 | 203    | 207 | 255   | 255 | 235  | 235 | 224    | 241 | 255   | 255 |
|  | D1 | 229  | 255 | 221    | 229 | 246   | 242 | 255  | 255 | 255    | 255 | 255   | 255 | 248  | 242 | 216    | 252 | 255   | 255 |
|  | D2 | 187  | 186 | 184    | 190 | 220   | 218 | 254  | 249 | 250    | 255 | 255   | 255 | 229  | 229 | 210    | 233 | 255   | 255 |
|  | D3 | 155  | 156 | 158    | 161 | 196   | 199 | 226  | 224 | 227    | 235 | 255   | 255 | 219  | 219 | 213    | 229 | 255   | 255 |
|  | D4 | 128  | 131 | 137    | 139 | 179   | 183 | 196  | 197 | 206    | 211 | 255   | 255 | 211  | 211 | 211    | 223 | 255   | 255 |
|  | D5 | 108  | 111 | 122    | 122 | 168   | 173 | 176  | 178 | 192    | 195 | 255   | 255 | 204  | 205 | 210    | 221 | 255   | 255 |
|  | D6 | 93   | 96  | 110    | 109 | 160   | 164 | 159  | 161 | 180    | 180 | 254   | 255 | 197  | 198 | 206    | 214 | 255   | 255 |

\*b=before aging; a= after aging
